# Supplementary material
Source: MDPI journal article supplement (https://www.mdpi.com/search?q=materials-14-00200)
Supplement: s001 [file materials-14-00200-s001.pdf]

Supplementary

## 3D-Printed Hermetic Alumina Housings

Max Eickenscheidt <sup>1,\*</sup>, Michael Langenmair <sup>1</sup>, Ahmad Dbouk <sup>1</sup>, Dorit Nötzel <sup>2</sup>, Thomas Hanemann <sup>2,3</sup>  
and Thomas Stieglitz <sup>1,4,5</sup>

- <sup>1</sup> Laboratory for Biomedical Microtechnology, Department of Microsystems Engineering-IMTEK, University of Freiburg, 79110 Freiburg, Germany; michael.langenmair@imtek.de (M.L.); ahmad-dbouk@hotmail.com (A.D.); thomas.stieglitz@imtek.uni-freiburg.de (T.S.)
  - <sup>2</sup> Institute for Applied Materials, Karlsruhe Institute of Technology, Karlsruhe, Germany; dorit.noetzel@kit.edu (D.N.); thomas.hanemann@kit.edu (T.H.)
  - <sup>3</sup> Laboratory for Materials Process Technology, Department of Microsystems Engineering-IMTEK, University of Freiburg, 79110 Freiburg, Germany
  - <sup>4</sup> Bernstein Center Freiburg, University of Freiburg, 79104 Freiburg, Germany
  - <sup>5</sup> Brain-Links Brain-Tools, University of Freiburg, 79110 Freiburg, Germany
- \* Correspondence: eickenscheidt@imtek.de; Tel.: +49-761-2036-7636

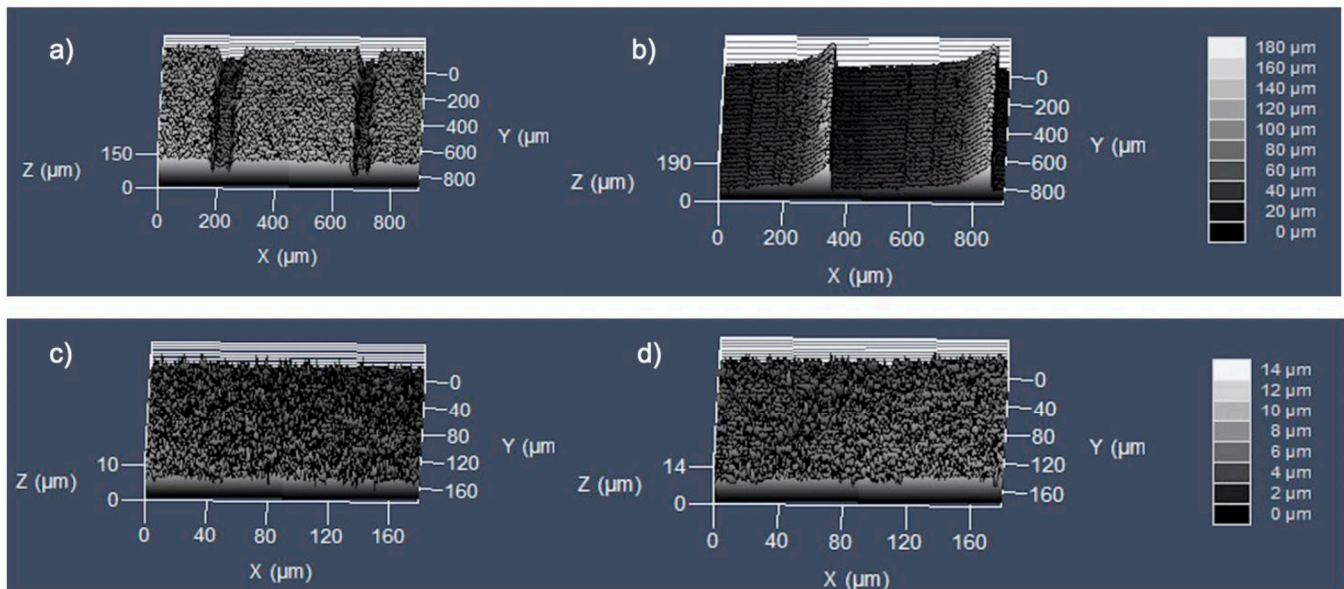

**Figure S1.** Surface roughness of a printed ceramic plate measured by confocal microscopy. (a) Bottom and (b) top side of a pristine printed sample after sintering. (c) Bottom and (d) top side after grinding of the same sample.
